# Supplementary figures and images for: A Neutrophil-Incorporated Nomogram for Predicting 3-Month Disability after Intravenous Thrombolysis in Acute Ischemic Stroke
Source: Research Square preprint supplement (doi:10.21203/rs.3.rs-8651893/v1), 2026-02-09

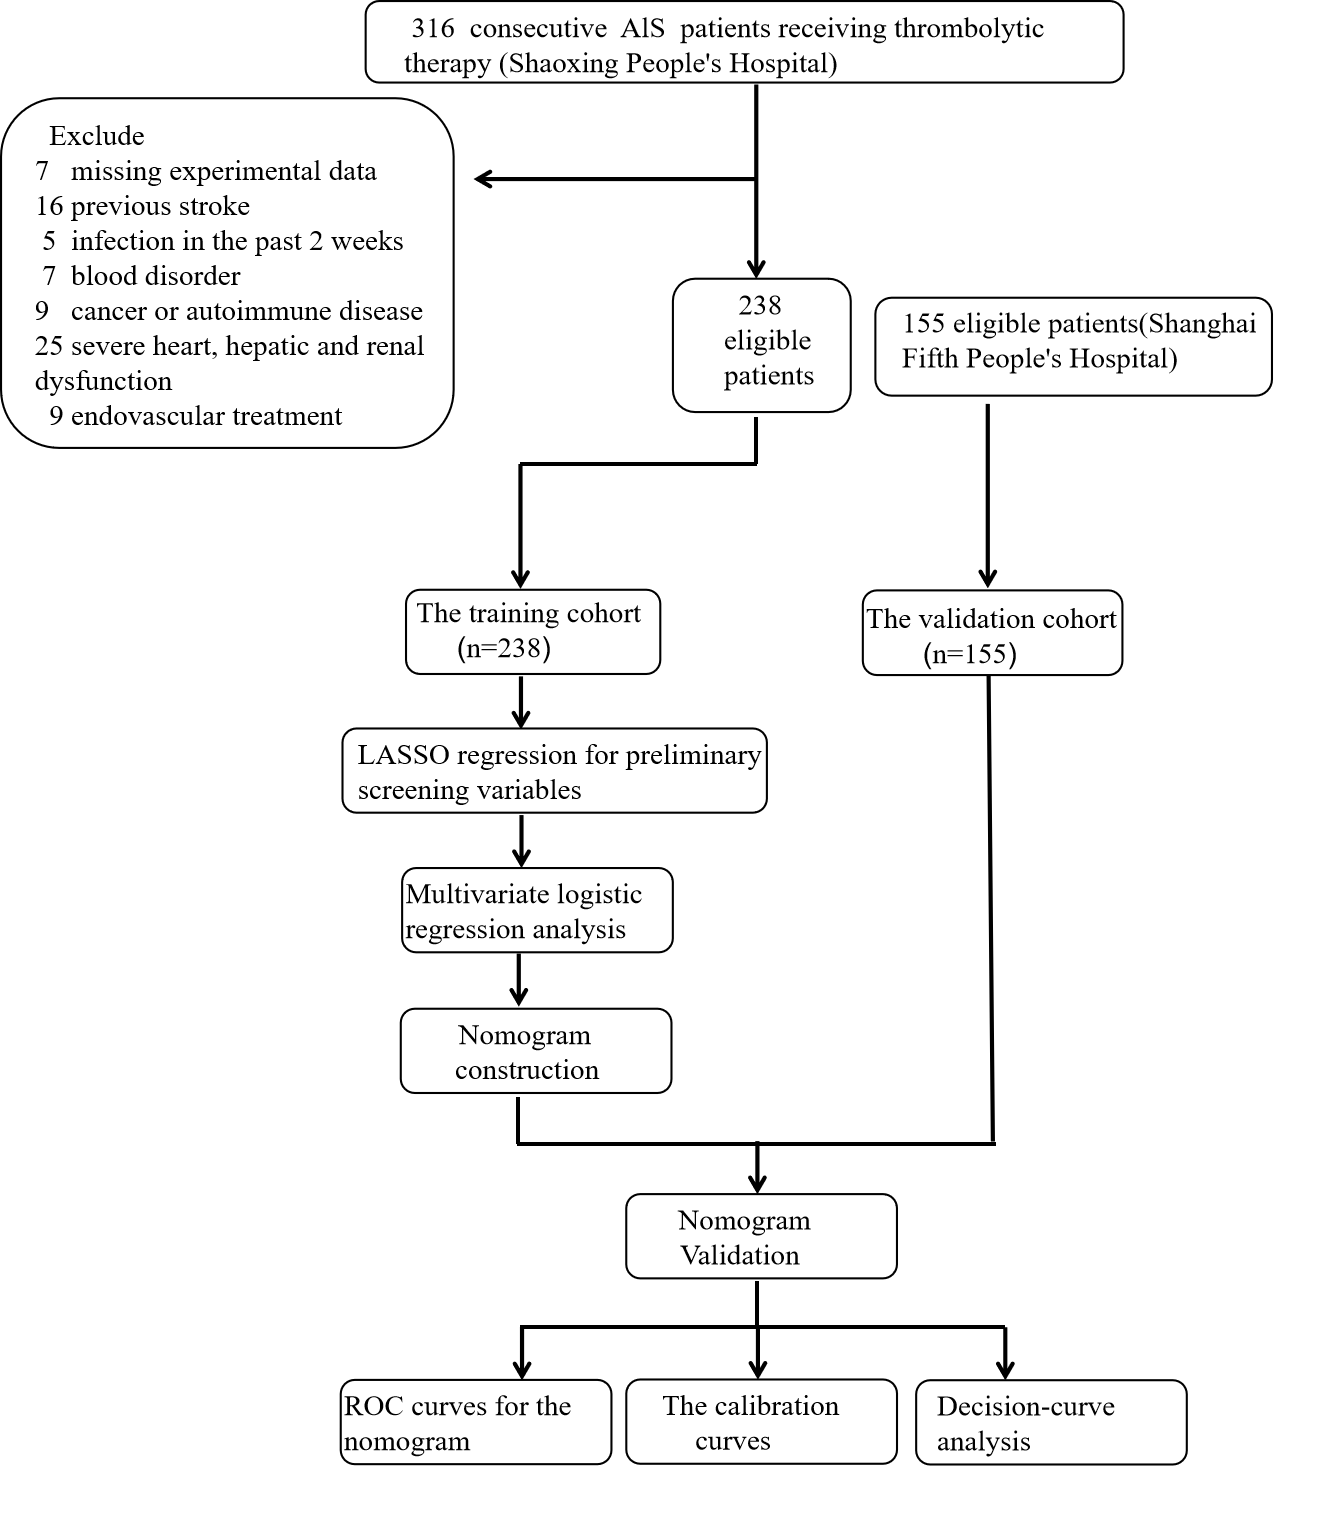


Supplementary Fig1. Flowchart for the study.

Supplement: Supplementary file 1 [file 4762e697f13695537a429725.docx]
